# Supplementary material for: Native bluegill influence the foraging and aggressive behavior of invasive mosquitofish
Source: PeerJ. 2019 Jan 10;7:e6203. doi: 10.7717/peerj.6203 (PMC6330202; doi:10.7717/peerj.6203)
Supplement: Supplemental Information 1 [file peerj-07-6203-s001.xlsx]

## Sheet: Invasive_Focals-dataset-Clemmer
Trial	Treatment	Focal Animal	Species	Sp+Gender	Focal(tmt)	Body Length	# Foraging Attempts	Total Time Foraging	Number Successful Foraging Attempts	Proportion Successful	Trans Prop Successful	Handling Time Total	Prop Successful Handling Time	# Handling Events	Prop Handling Events Successful	Trans Prop Success Handling Time	Trans Prop Success Handling Events	# Handl-event success	# Handl-event unsuccess	Prop UnSucc H-events	Trans Prop UnSucc H-events	Prop UnSucc H-time	Trans Prop Unsucc H-time	Total H-time success	Total H-time UnSucc	H-time per success event	H-time per unsuccess event	foraging time/foraging events	H-time/H-event
1	FB	F	MOS	MOS F	F(FB)	35	14	249.08	6	0.428571	0.713724	155.02	0.296736	3	0.333333	0.576073	0.61548	1	2	0.666667	0.955317	0.703264	0.994724	46	109.02	46	54.51	17.7914	51.6733
2	FB	F	MOS	MOS F	F(FB)	33	12	30.81	5	0.416667	0.701674																	2.5675
3	FB	F	MOS	MOS F	F(FB)	34	24	86.28	9	0.375	0.659058	21.48	0.357542	4	0.25	0.640939	0.523599	1	3	0.75	1.0472	0.642458	0.929858	7.68	13.8	7.68	4.6	3.595	5.37
4	FB	F	MOS	MOS F	F(FB)	36	3	25.04	3	1	1.5708	18.74	1	2	1	1.5708	1.5708	2	0	0	0	0	0	18.74		9.37		8.34667	9.37
5	FB	F	MOS	MOS F	F(FB)	31	10	398.88	7	0.7	0.991157	363.15	0	2	0	0	0	0	2	1	1.5708	1	1.5708		363.15		181.58	39.888	181.575
6	FB	F	MOS	MOS F	F(FB)	33	3	50.6	1	0.333333	0.61548	3.84	1	1	1	1.5708	1.5708	1	0	0	0	0	0	3.84		38.84		16.8667	3.84
7	FB	F	MOS	MOS F	F(FB)	37	9	22.04	8	0.888889	1.23096																	2.44889
8	FB	F	MOS	MOS F	F(FB)	36	29	229.29	18	0.62069	0.907292	148.49	0.68375	5	0.4	0.973558	0.684719	2	3	0.6	0.886077	0.31625	0.597239	101.53	46.96	50.77	15.65	7.90655	29.698
9	FB	F	MOS	MOS F	F(FB)	38	7	42.42	6	0.857143	1.1832	20.86	1	1	1	1.5708	1.5708	1	0	0	0	0	0	20.86		20.86		6.06	20.86
1	FF	F1	MOS	MOS F	F(FF)	32	9	57.99	4	0.444444	0.729728	32.96	1	1	1	1.5708	1.5708	1	0	0	0	0	0	32.96		32.96		6.44333	32.96
2	FF	F2	MOS	MOS F	F(FF)	32	4	8.48	4	1	1.5708																	2.12
3	FF	F1	MOS	MOS F	F(FF)	36	6	40.59	4	0.666667	0.955317	24.96	0	1	0	0	0	0	1	1	1.5708	1	1.5708		24.96		24.96	6.765	24.96
4	FF	F2	MOS	MOS F	F(FF)	31	12	130.17	7	0.583333	0.869122	87.09	0.945459	2	0.5	1.33508	0.785398	1	1	0.5	0.785398	0.0545413	0.235718	82.34	4.75	82.34	4.75	10.8475	43.545
5	FF	F1	MOS	MOS F	F(FF)	33	12	199.74	8	0.666667	0.955317	169.54	0.353663	5	0.4	0.636887	0.684719	2	3	0.6	0.886077	0.646337	0.933909	59.96	109.58	20.98	36.53	16.645	33.908
6	FF	F2	MOS	MOS F	F(FF)	30	6	23.04	3	0.5	0.785398																	3.84
7	FF	F1	MOS	MOS F	F(FF)	35	10	30.8	9	0.9	1.24905																	3.08
8	FF	F2	MOS	MOS F	F(FF)	38	7	13.34	6	0.857143	1.1832																	1.90571
9	FF	F1	MOS	MOS F	F(FF)	37	5	12.05	4	0.8	1.10715																	2.41
10	FF	F2	MOS	MOS F	F(FF)	32	19	49.67	16	0.842105	1.16216																	2.61421
1	FM	F	MOS	MOS F	F(FM)	33	6	19.48	3	0.5	0.785398																	3.24667
2	FM	F	MOS	MOS F	F(FM)	33	5	29	2	0.4	0.684719	15.24	0.614829	2	0.5	0.901262	0.785398	1	1	0.5	0.785398	0.385171	0.669535	9.37	5.87	9.37	5.87	5.8	7.62
3	FM	F	MOS	MOS F	F(FM)	34	5	15.82	4	0.8	1.10715																	3.164
4	FM	F	MOS	MOS F	F(FM)	30	10	59.45	7	0.7	0.991157	20.59	1	1	1	1.5708	1.5708	1	0	0	0	0	0	20.59		20.59		5.945	20.59
5	FM	F	MOS	MOS F	F(FM)	32	8	21.65	5	0.625	0.911738																	2.70625
6	FM	F	MOS	MOS F	F(FM)	35	13	65.88	7	0.538462	0.823898	28	0	1	0	0	0	0	1	1	1.5708	1	1.5708		28		28	5.06769	28
7	FM	F	MOS	MOS F	F(FM)	29	8	43.86	6	0.75	1.0472	12.33	0	1	0	0	0	0	1	1	1.5708	1	1.5708		12.33		12.33	5.4825	12.33
8	FM	F	MOS	MOS F	F(FM)	34	7	25.44	7	1	1.5708	2.9	1	1	1	1.5708	1.5708	1	0	0	0	0	0	2.9		2.9		3.63429	2.9
9	FM	F	MOS	MOS F	F(FM)	41	4	8.58	4	1	1.5708																	2.145
10	FM	F	MOS	MOS F	F(FM)	31	7	89.83	7	1	1.5708	50.22	1	2	1	1.5708	1.5708	2	0	0	0	0	0	50.22		25.11		12.8329	25.11
1	FM	M	MOS	MOS M	M(FM)	26	6	17.23	4	0.666667	0.955317																	2.87167
2	FM	M	MOS	MOS M	M(FM)	30	11	157.8	5	0.454545	0.739881	102.04	0.406017	4	0.25	0.690853	0.523599	1	3	0.75	1.0472	0.593983	0.879943	41.43	60.61	41.43	20.2	14.3455	25.51
3	FM	M	MOS	MOS M	M(FM)	24	2	8.24	2	1	1.5708																	4.12
4	FM	M	MOS	MOS M	M(FM)	29	10	37.11	6	0.6	0.886077	11.87	1	1	1	1.5708	1.5708	1	0	0	0	0	0	11.87		11.87		3.711	11.87
5	FM	M	MOS	MOS M	M(FM)	25	6	452.58	3	0.5	0.785398	445.04	0.96834	5	0.6	1.39191	0.886077	3	2	0.4	0.684719	0.0316601	0.178885	430.95	14.09	163.65	7.05	75.43	89.008
6	FM	M	MOS	MOS M	M(FM)	26	13	322.76	5	0.384615	0.668964	274.18	0	3	0	0	0	0	3	1	1.5708	1	1.5708		274.18		91.39	24.8277	91.3933
7	FM	M	MOS	MOS M	M(FM)	26	13	63.49	11	0.846154	1.16774																	4.88385
8	FM	M	MOS	MOS M	M(FM)	30	2	12.26	2	1	1.5708	8.3	1	1	1	1.5708	1.5708	1	0	0	0	0	0	8.3		8.3		6.13	8.3
9	FM	M	MOS	MOS M	M(FM)	29	4	17.19	2	0.5	0.785398																	4.2975
10	FM	M	MOS	MOS M	M(FM)	26	3	9.16	2	0.666667	0.955317																	3.05333
1	MB	M	MOS	MOS M	M(MB)	27	18	83.19	3	0.166667	0.420534																	4.62167
2	MB	M	MOS	MOS M	M(MB)	30	7	32.9	3	0.428571	0.713724																	4.7
3	MB	M	MOS	MOS M	M(MB)	25	14	50.99	9	0.642857	0.930274																	3.64214
4	MB	M	MOS	MOS M	M(MB)	28	22	88.63	10	0.454545	0.739881	5.03	0	1	0	0	0	0	1	1	1.5708	1	1.5708		5.03		5.03	4.02864	5.03
5	MB	M	MOS	MOS M	M(MB)	26	5	23.11	2	0.4	0.684719																	4.622
6	MB	M	MOS	MOS M	M(MB)	25	9	451.83	5	0.555556	0.841069	412.59	0.0418818	2	0.5	0.206106	0.785398	1	1	0.5	0.785398	0.958118	1.36469	17.28	395.31	17.28	395.31	50.2033	206.295
7	MB	M	MOS	MOS M	M(MB)	26	4	17.96	4	1	1.5708																	4.49
8	MB	M	MOS	MOS M	M(MB)	29	6	11.87	5	0.833333	1.15026																	1.97833
9	MB	M	MOS	MOS M	M(MB)	30	3	10.91	2	0.666667	0.955317																	3.63667
10	MB	M	MOS	MOS M	M(MB)	28	10	41.65	7	0.7	0.991157	13.4	0	1	0	0	0	0	1	1	1.5708	1	1.5708		13.4		13.4	4.165	13.4
1	MM	M2	MOS	MOS M	M(MM)	25	6	36.35	1	0.166667	0.420534																	6.05833
2	MM	M1	MOS	MOS M	M(MM)	25	10	40.41	8	0.8	1.10715																	4.041
3	MM	M2	MOS	MOS M	M(MM)	30	7	150.51	3	0.428571	0.713724	135.71	1	1	1	1.5708	1.5708	1	0	0	0	0	0	135.71		135.71		21.5014	135.71
4	MM	M1	MOS	MOS M	M(MM)	26	7	52.36	5	0.714286	1.00685	27.62	1	1	1	1.5708	1.5708	1	0	0	0	0	0	27.62		27.62		7.48	27.62
5	MM	M2	MOS	MOS M	M(MM)	26	16	433.75	8	0.5	0.785398	381.85	0.946602	6	0.333333	1.33761	0.61548	2	4	0.666667	0.955317	0.0533979	0.233188	361.46	20.39	180.73	5.1	27.1094	63.6417
6	MM	M1	MOS	MOS M	M(MM)	27	8	174.86	3	0.375	0.659058	136.8	1	2	1	1.5708	1.5708	2	0	0	0	0	0	136.8		68.4		21.8575	68.4
7	MM	M1	MOS	MOS M	M(MM)	27	7	349.43	7	1	1.5708	310.7	1	2	1	1.5708	1.5708	2	0	0	0	0	0	310.7		155.35		49.9186	155.35
8	MM	M2	MOS	MOS M	M(MM)	30	0	0	0	0	0
9	MM	M1	MOS	MOS M	M(MM)	32	8	32.64	3	0.375	0.659058	8.96	1	1	1	1.5708	1.5708	1	0	0	0	0	0	8.96		8.96		4.08	8.96
10	MM	M2	MOS	MOS M	M(MM)	29	6	26.91	2	0.333333	0.61548	9.16	1	1	1	1.5708	1.5708	1	0	0	0	0	0	9.16		9.16		4.485	9.16
